# Supplementary material
Source: PubMed Central journal article supplement (PMC7769920)
Supplement: NIHMS1639301-supplement-1.pdf [file NIHMS1639301-supplement-1.pdf]

# Supplementary Figure 1

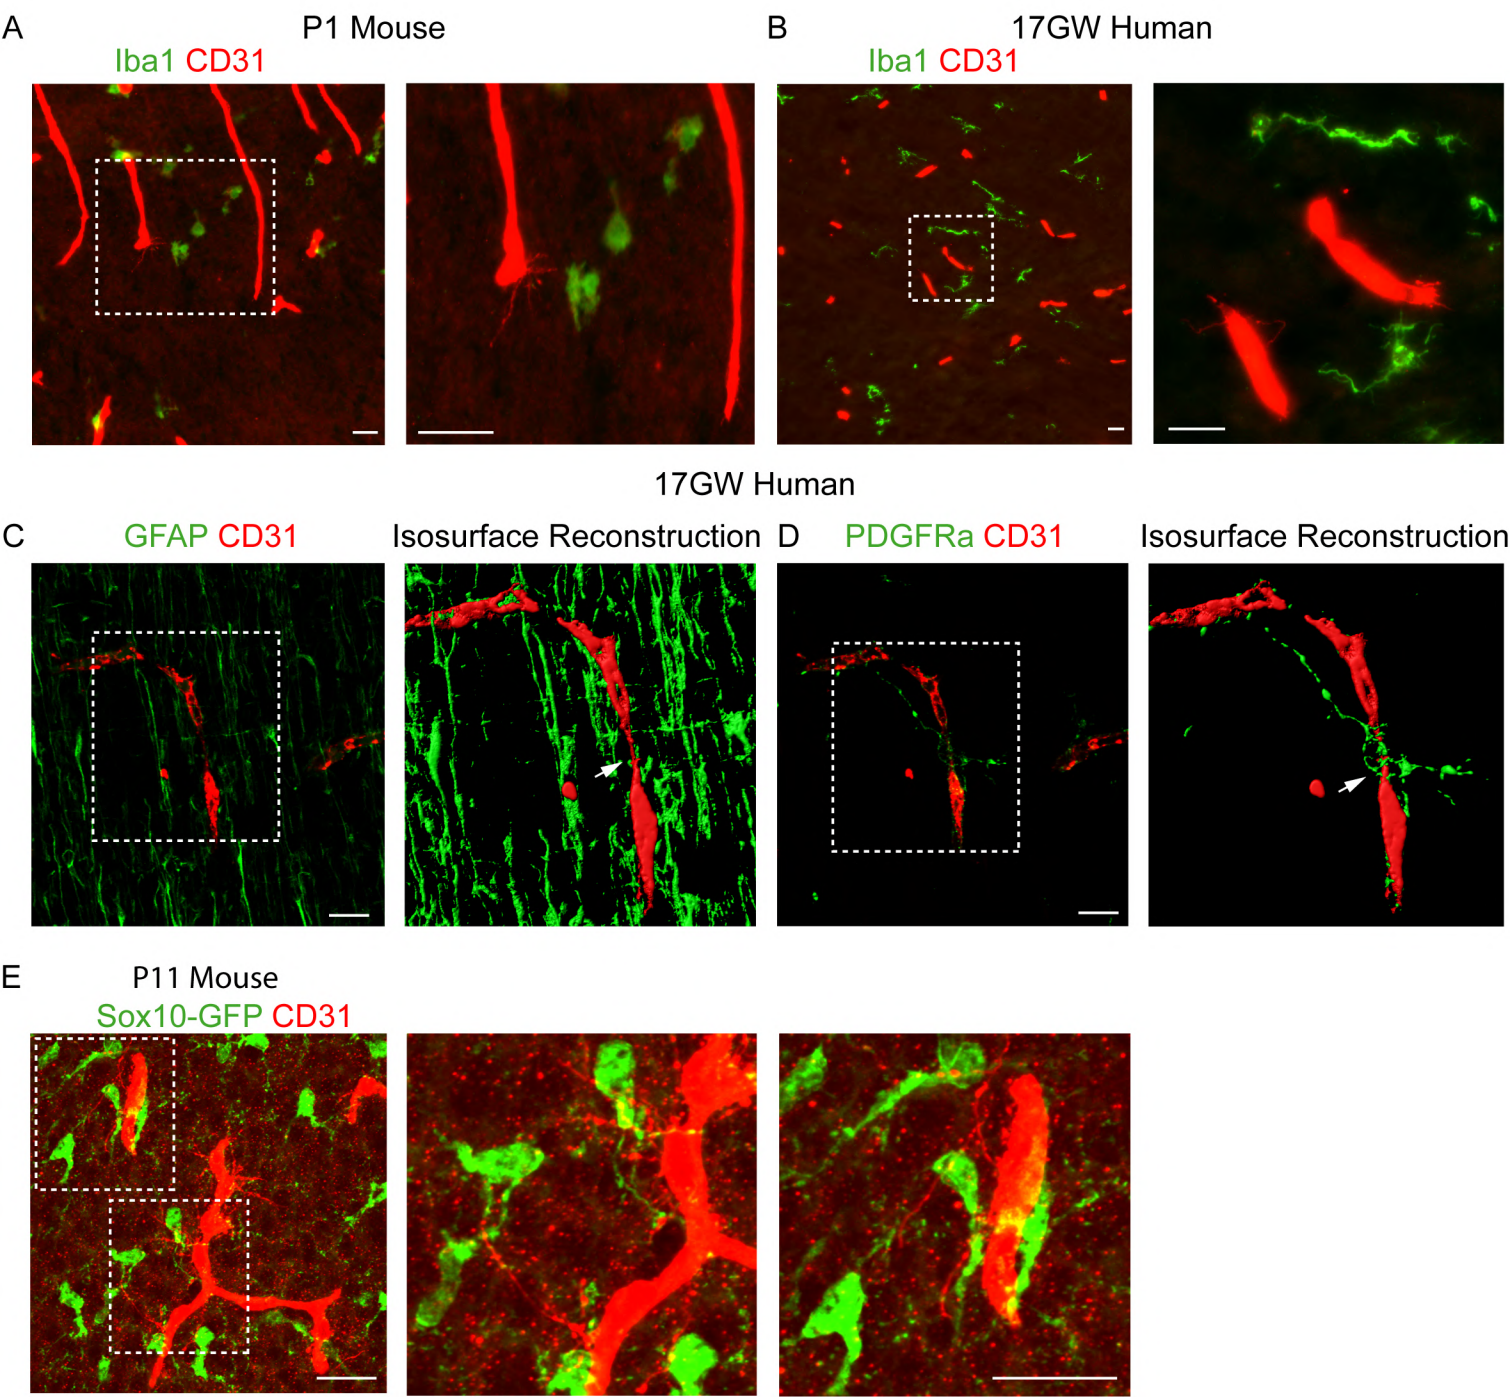

**Supplementary Figure 1: Characterization of Glial-Endothelial Tip Cell Interactions. (Related to Figure 1)**

(A) Representative images from P1 mouse brain labelled with Iba1 and CD31 show that microglial cells (Iba1+ cells) don't frequently contact endothelial tip cells in developing white matter. Scale bar: 25µm.

(B) Representative images from 17GW human brain labelled with Iba1 and CD31 show that microglial cells (Iba1+ cells) don't frequently contact endothelial tip cells in developing deep cortical regions adjacent to the ventricle. Scale bar: 25µm.

(C-D) Representative images from 17GW human brain coronal section labelled with GFAP (C), PDGFRα (D) and CD31. Isosurface reconstruction of highlighted region shows that PDGFRα+ OPCs but not GFAP+ astroglial cell processes make complex contacts with endothelial tip cells at the sites where neighboring vessels fuse. Scale bar: 25µm.

(E) Representative images from P11 *Sox10-GFP* transgenic mouse labelled with CD31 show that OPC-endothelial tip cell contacts persist into late postnatal stages in white matter. Scale bar: 25µm.

Supplementary Figure 2

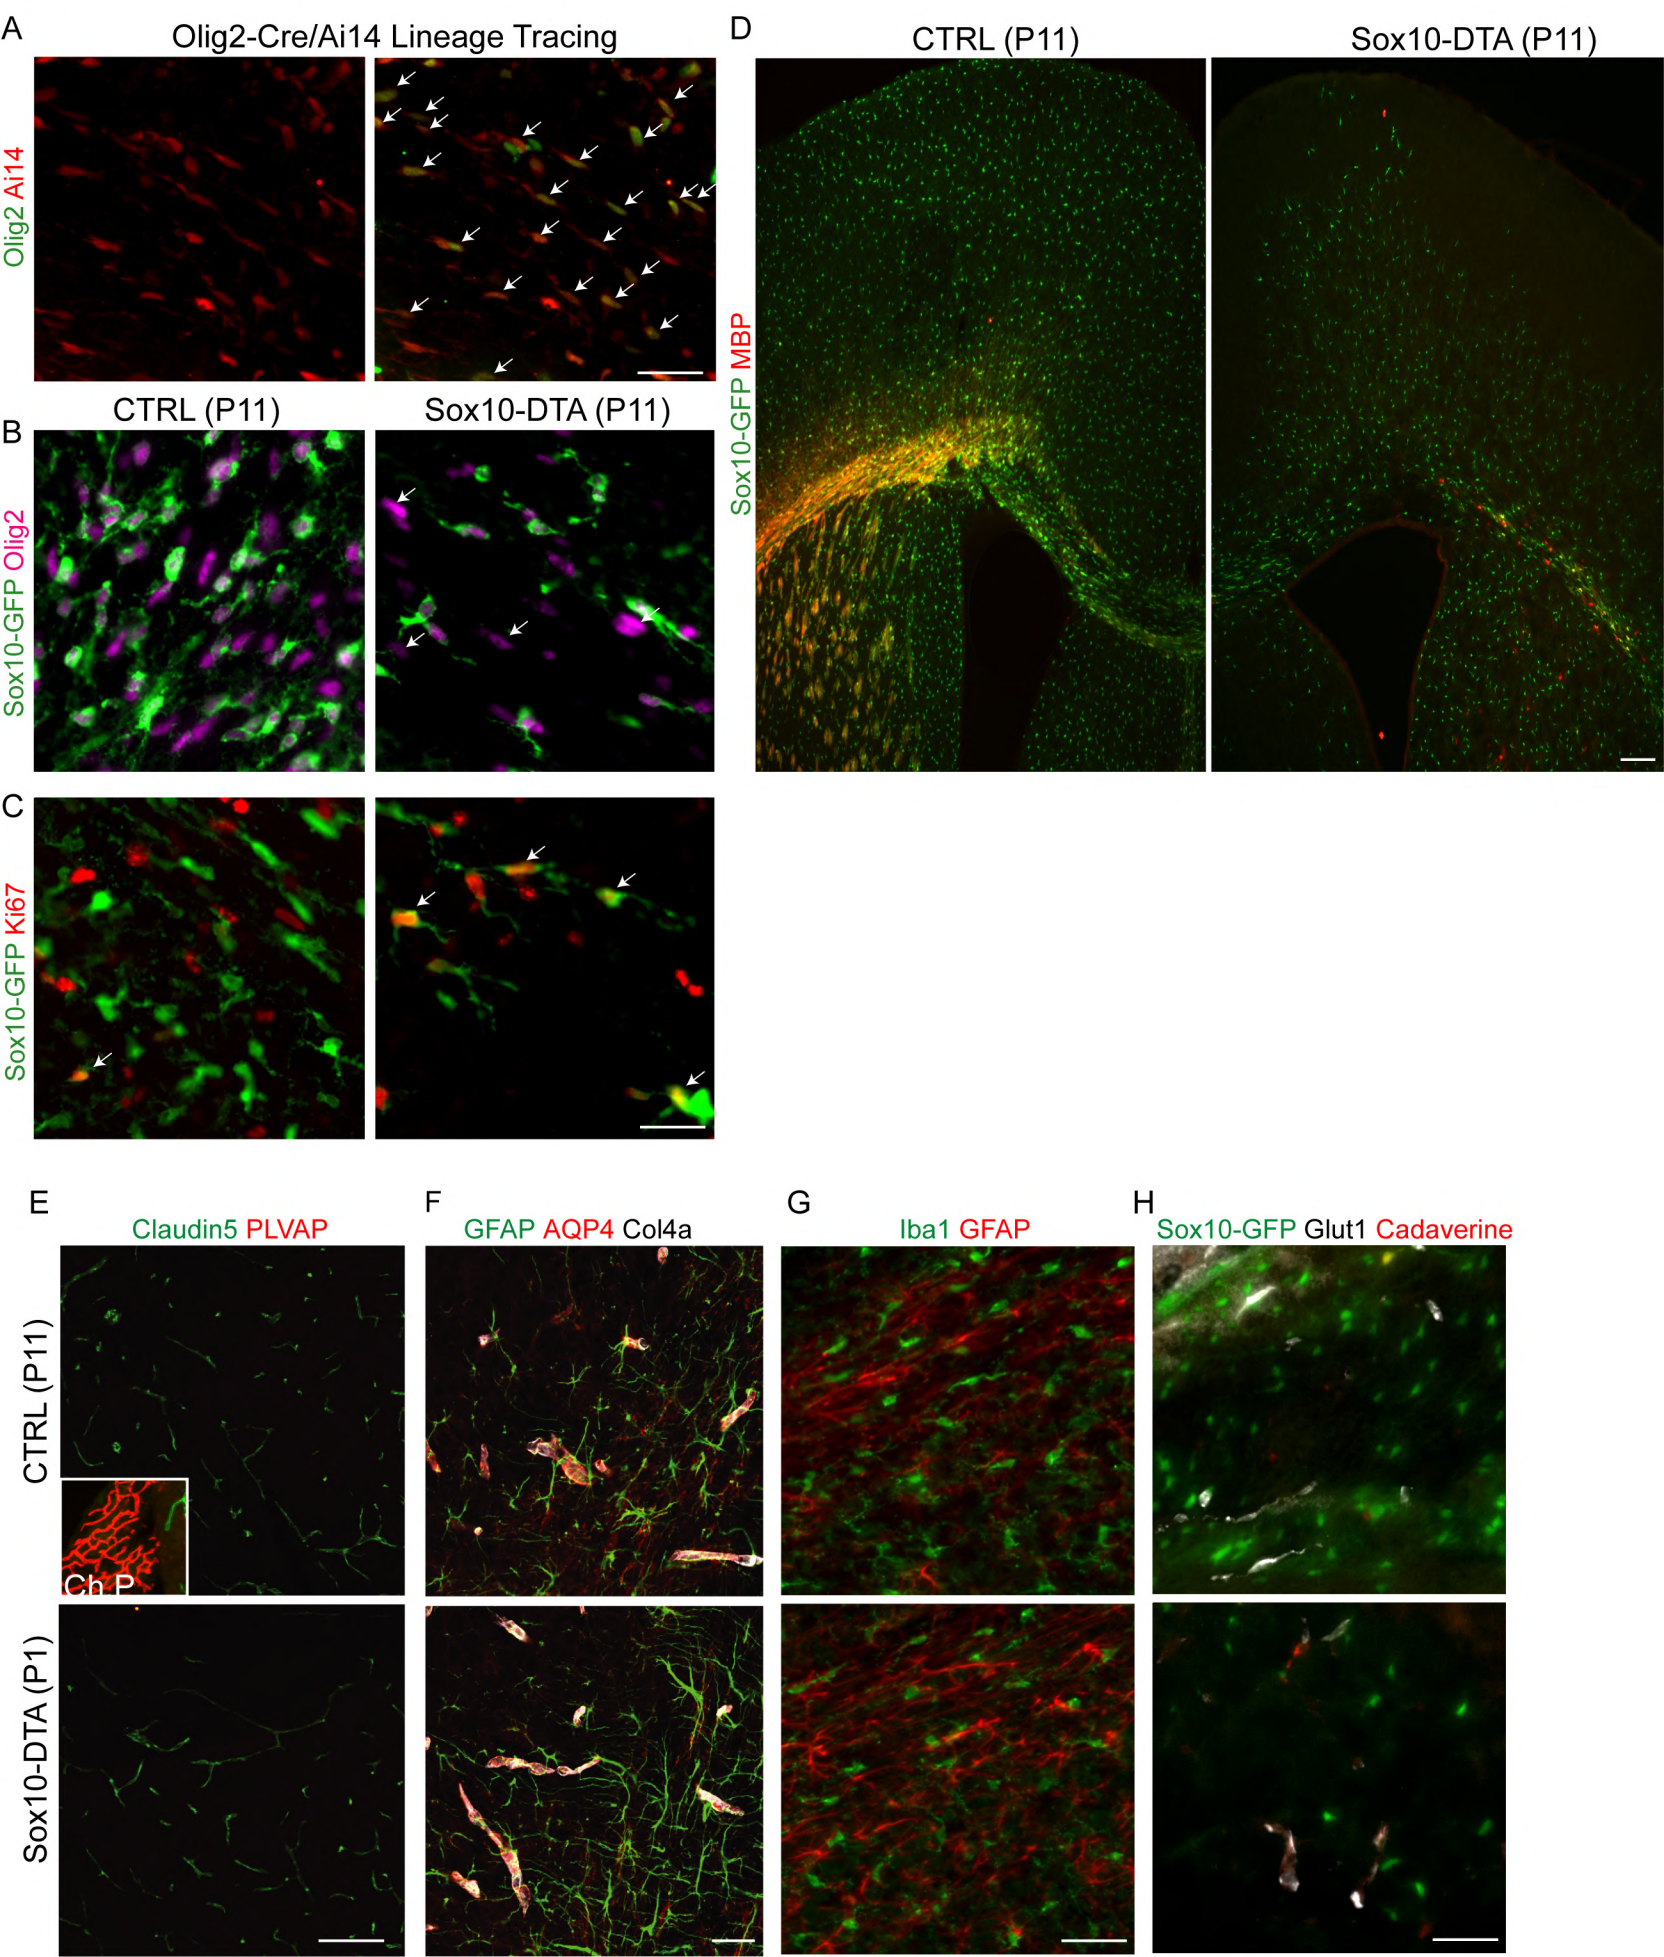

**Supplementary Figure 2: Characterization of *Olig2-Cre/Sox10-DTA* model.  
(Related to Figure 2)**

(A) Lineage tracing analysis reveals that ~75% of oligodendroglial cells in the white matter are targeted by *Olig2-Cre* line. Scale bar: 50µm.

(B) Representative images from P1 Control and *Sox10-DTA* white matter shows oligodendroglial targeting by *Sox10-DTA* strategy. Scale bar: 50 µm.

(C) Oligodendroglial cells that escape recombination by either *Olig2-Cre* or *Sox10-DTA* strategy proliferate in an effort to repopulate the brain. Scale bar: 50 µm.

(D) Coronal brain sections from Control and *Sox10-DTA* mice at P11 shows repopulation of oligodendroglial cells. *Sox10-DTA* animals remain hypomyelinated at P11. Scale bar: 100 µm.

(E) Oligodendroglial ablation in *Sox10-DTA* did not cause BBB disruptions as revealed by lack of Claudin5 negative PLVAP positive endothelial cells. Inset in top panel represents positive control for PLVAP labelling, showing PLVAP+ vessels in choroid plexus from the same section. Scale bar: 50µm.

(F) Astrocyte endfeet coverage abnormalities were not observed in *Sox10-DTA* mice. Scale bar: 50µm.

(G) No major microglial (Iba1+) or astroglial reactivity (GFAP+) were observed in *Sox10-DTA* white matter. Scale bar, 50µm.

(H) Representative images from corpus collosum region of Cadaverine-555 injected Control and *Sox10-DTA* mice labelled with Glut1. Note no leakage of cadaverine-555 in *Sox10-DTA* animals, indicating no damage to BBB. Scale bar: 50µm.

Supplementary Figure 3

A

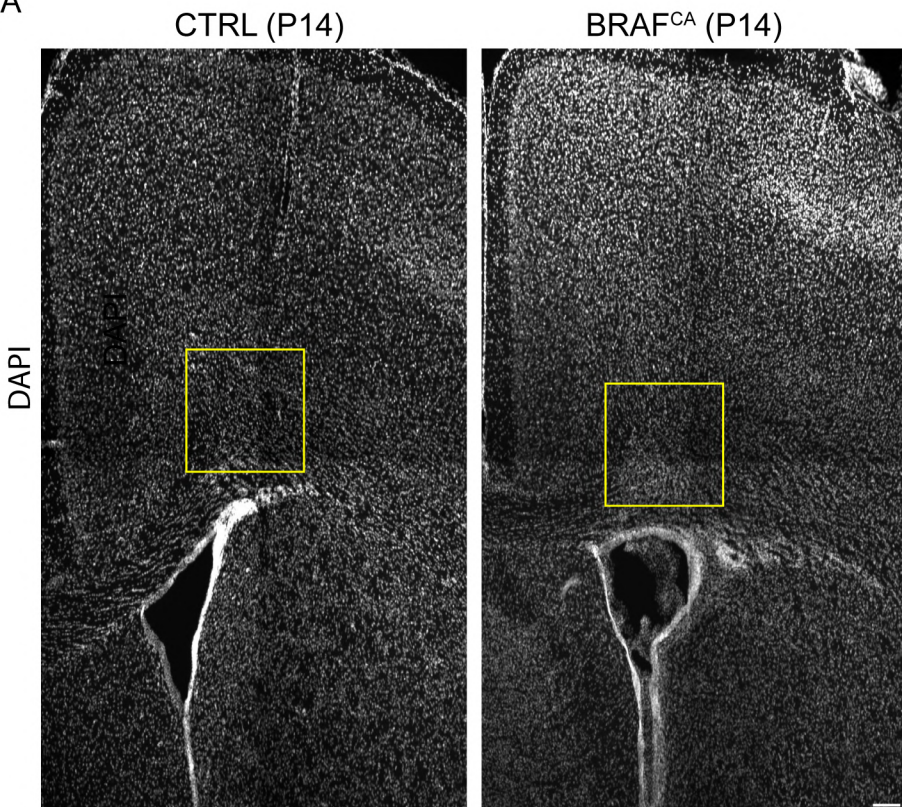

B

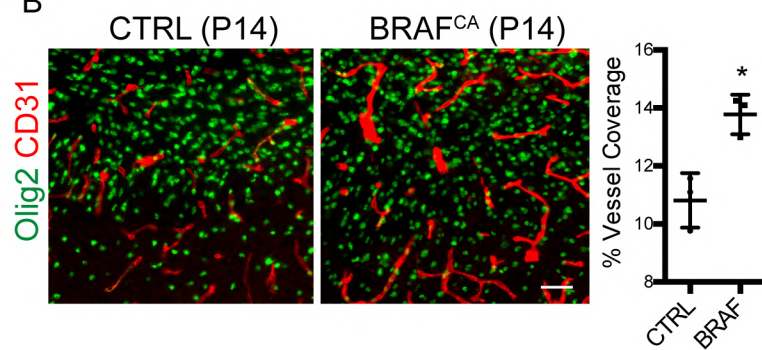

C

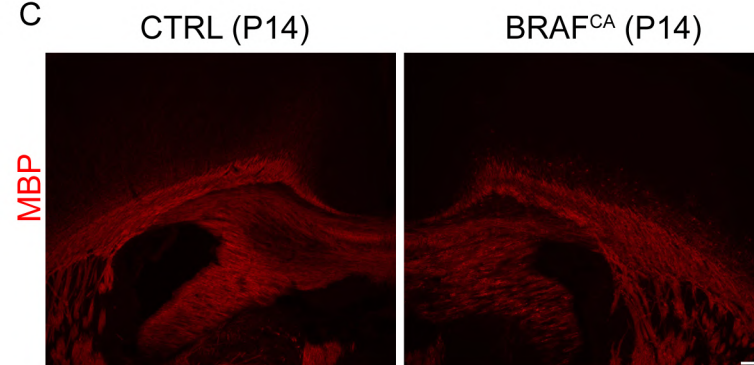

D

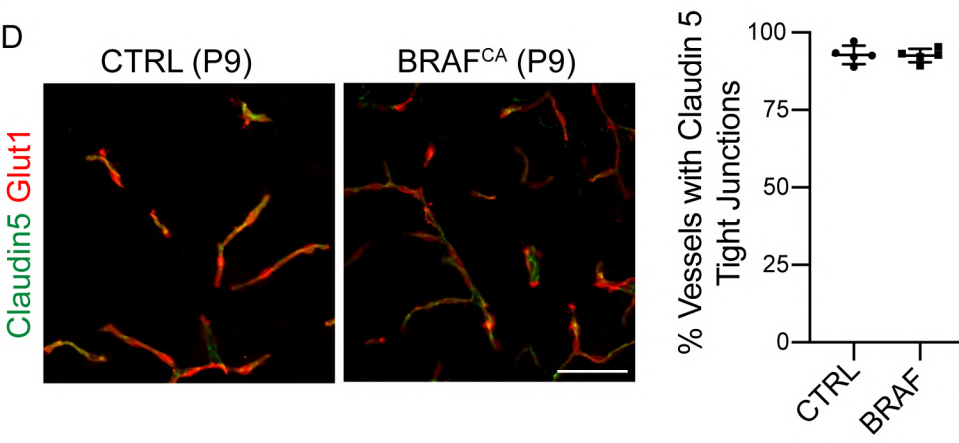

**Supplementary Figure 3: Characterization of *BRAF<sup>CA</sup>* Forebrain White Matter.  
(Related to Figure 3)**

(A) DAPI stained coronal brain sections from *BRAF<sup>CA</sup>* mice. Scale bar: 100  $\mu$ m.

(B) Olig2 and CD31 labelling of highlighted regions from (A) reveal hypervascularization of *BRAF<sup>CA</sup>* forebrain white matter at P14. Scale bar: 50 $\mu$ m.

(C) Mild decrease in myelin levels (MBP) were observed in *BRAF<sup>CA</sup>* forebrain white matter at P14, when they begin to display motor abnormalities and increase in mortality. Scale bar: 100 $\mu$ m.

(D) Representative images of white matter region from Control and *BRAF<sup>CA</sup>* brain sections labelled with Claudin 5 and Glut1. Note the absence of Claudin 5 and Glut1 negative vessels, indicating no blood brain barrier (BBB) damage. No significant changes in Claudin 5+ vessel coverage in white matter, indicating no tight junction disruptions. Scale bars: 50 $\mu$ m. Data are represented as mean  $\pm$  S.D. and analyzed by two-tailed unpaired Student's t test. n=3 animals/genotype for data shown in (B) and n=5 for (D). Significance between two groups are shown as \*p<0.05.

Supplementary Figure 4

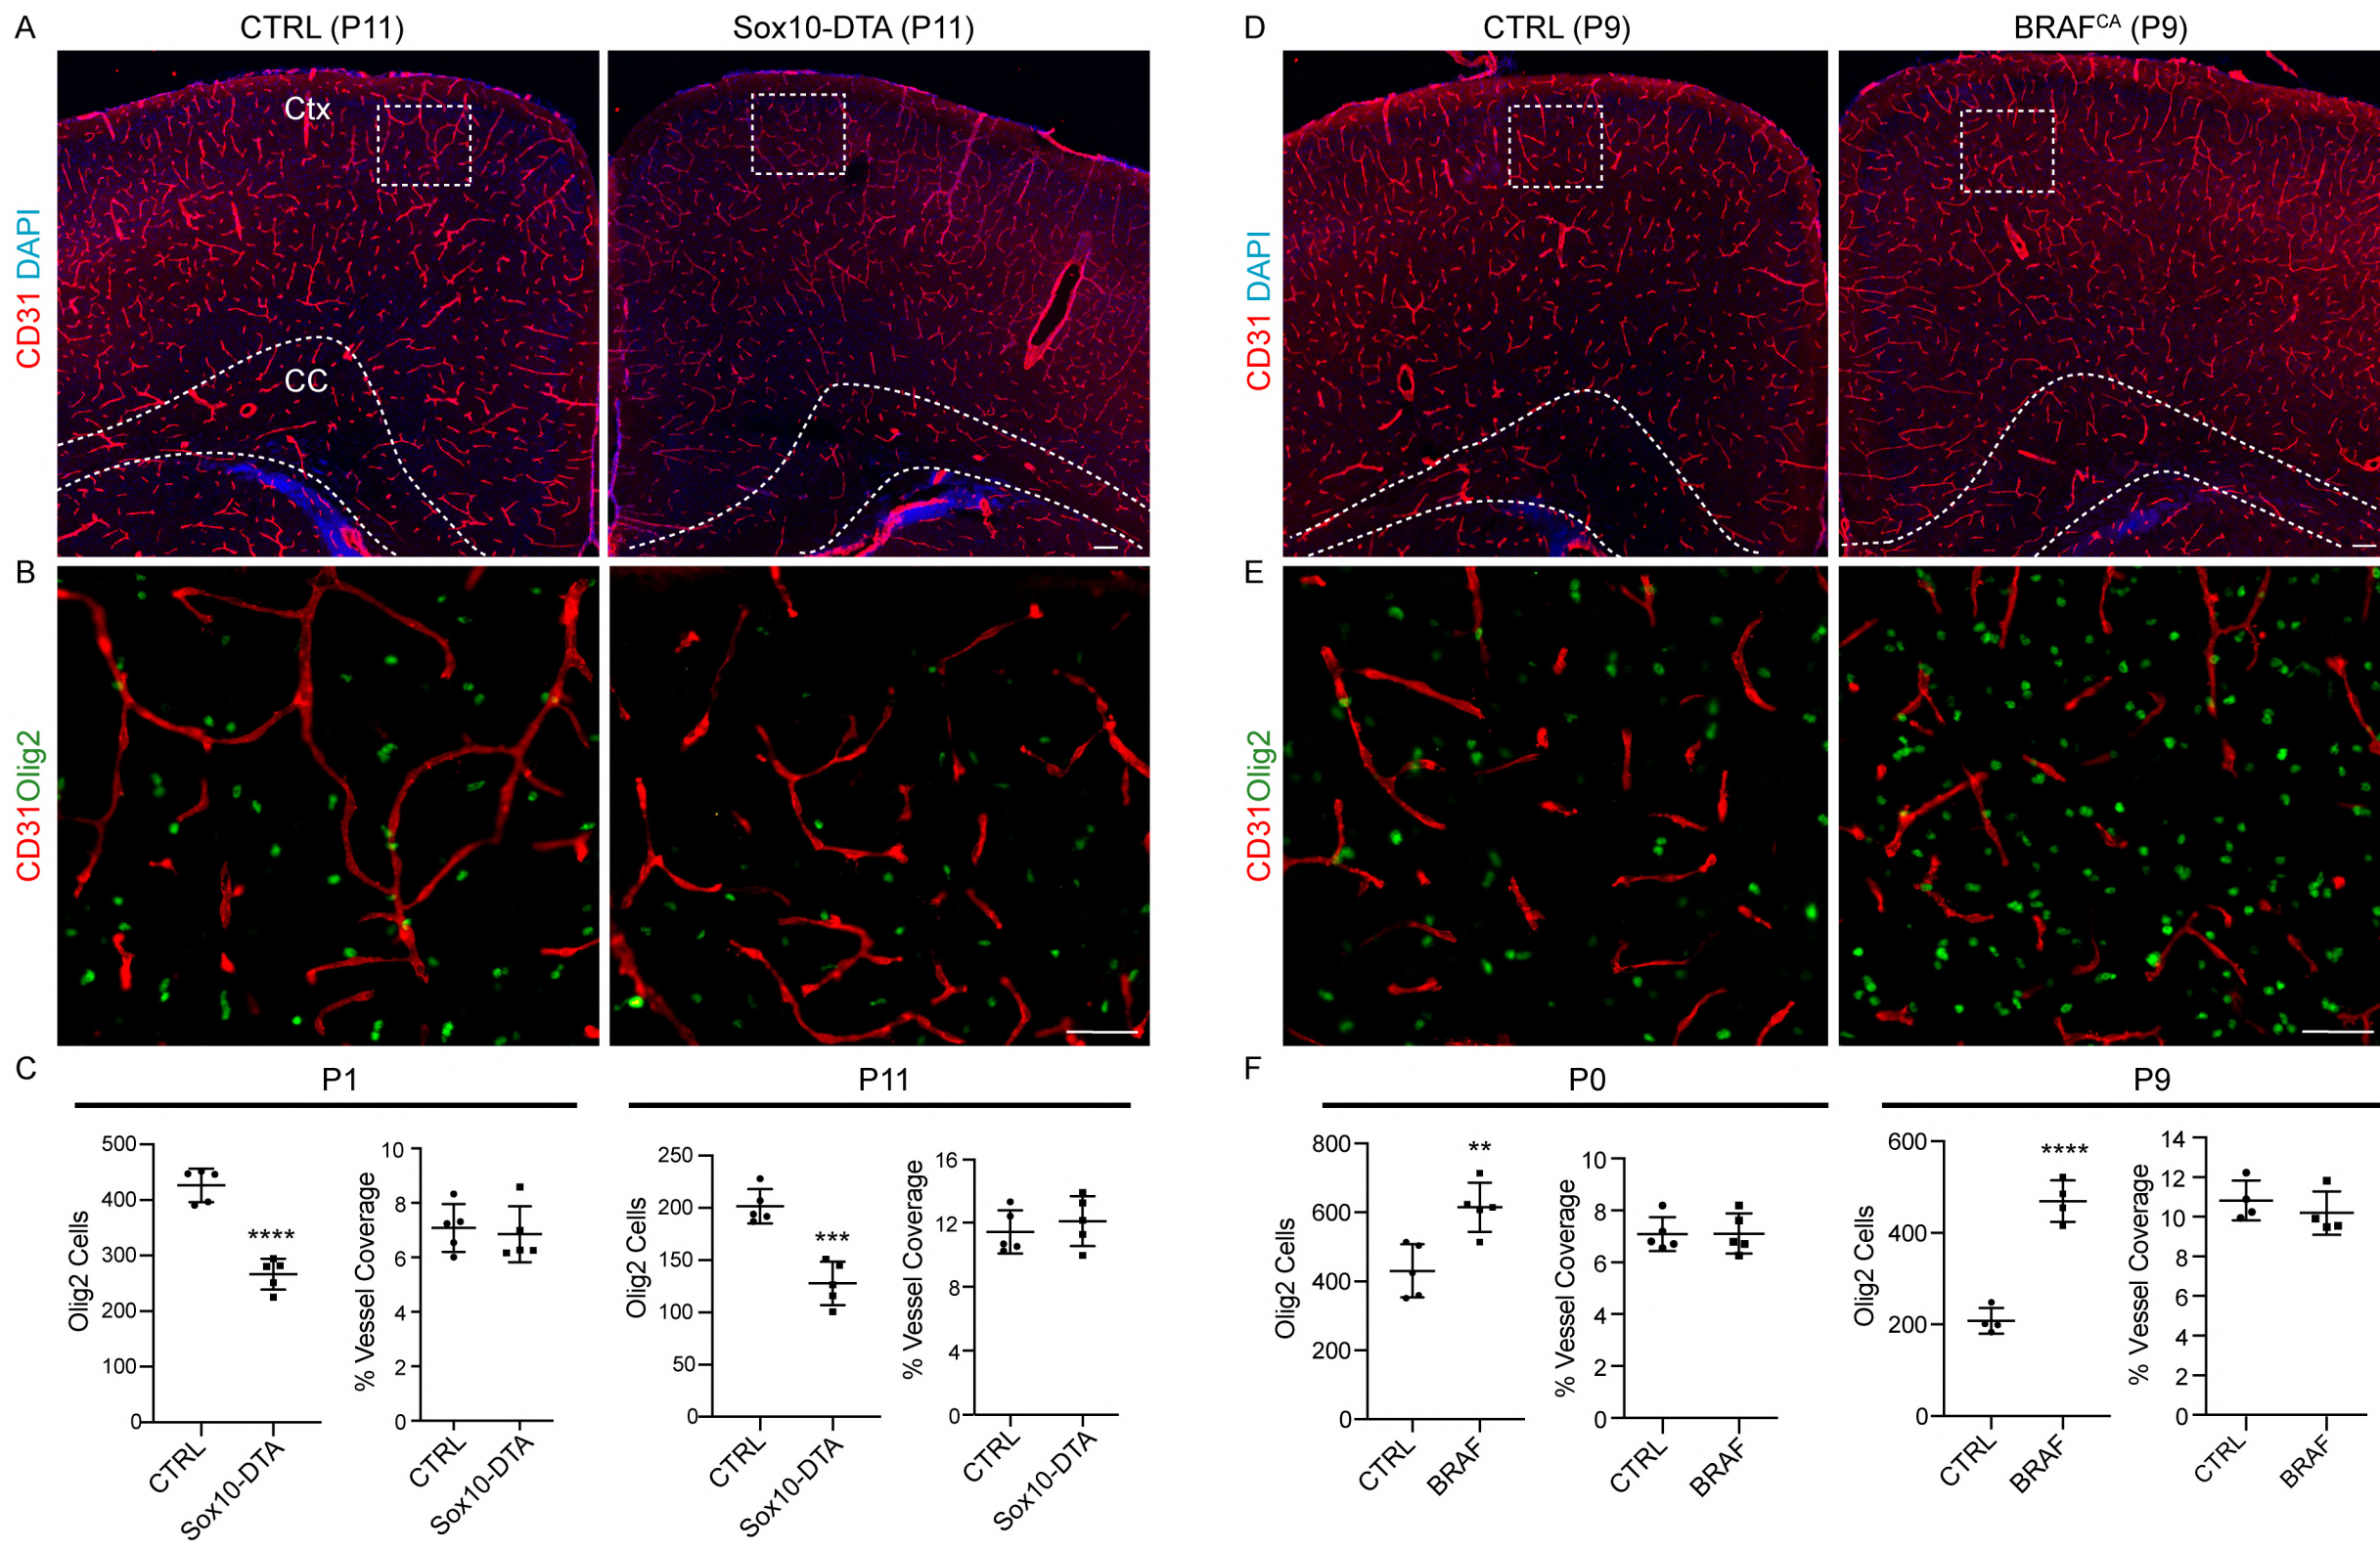

**Supplementary Figure 4: OPC Density Does Not Alter Forebrain Cortical Vascular Coverage. (Related to Figures 2 and 3)**

(A) Representative images from P11 - Control and *Sox10-DTA* coronal brain sections labelled with CD31 showing no alterations in cortical vascular coverage. Scale bar: 100µm Ctx: Cortex, CC: Corpus Collosum.

(B) Cortical regions (highlighted in A), showing a decrease in Olig2+ cell numbers but not vascular coverage. Scale bar: 50µm.

(C) Quantification of Olig2+ cell numbers and vascular coverage from forebrain cortical regions of P1 and P11 CTRL and *Sox10-DTA* mice.

(D) Representative images from P9 - Control and *BRAF<sup>CA</sup>* coronal brain sections labelled with CD31 showing no alterations in cortical vascular coverage. Scale bar: 100µm

(E) Cortical regions (highlighted in D), showing an increase in Olig2+ cell numbers but not vascular coverage. Scale bar: 50µm.

(F) Quantification of Olig2+ cell numbers and vascular density from forebrain cortical regions of P0 and P9 CTRL and *BRAF<sup>CA</sup>* mice. Data are represented as mean  $\pm$  S.D. and analyzed by two-tailed unpaired Student's t test. n=4-5 animals/genotype for data shown in C and F. Significance between two groups are shown as \*\*p<0.01, \*\*\*p<0.001, \*\*\*\* p<0.0001. Ctx: Cortex, CC: Corpus Collosum.

Supplementary Figure 5

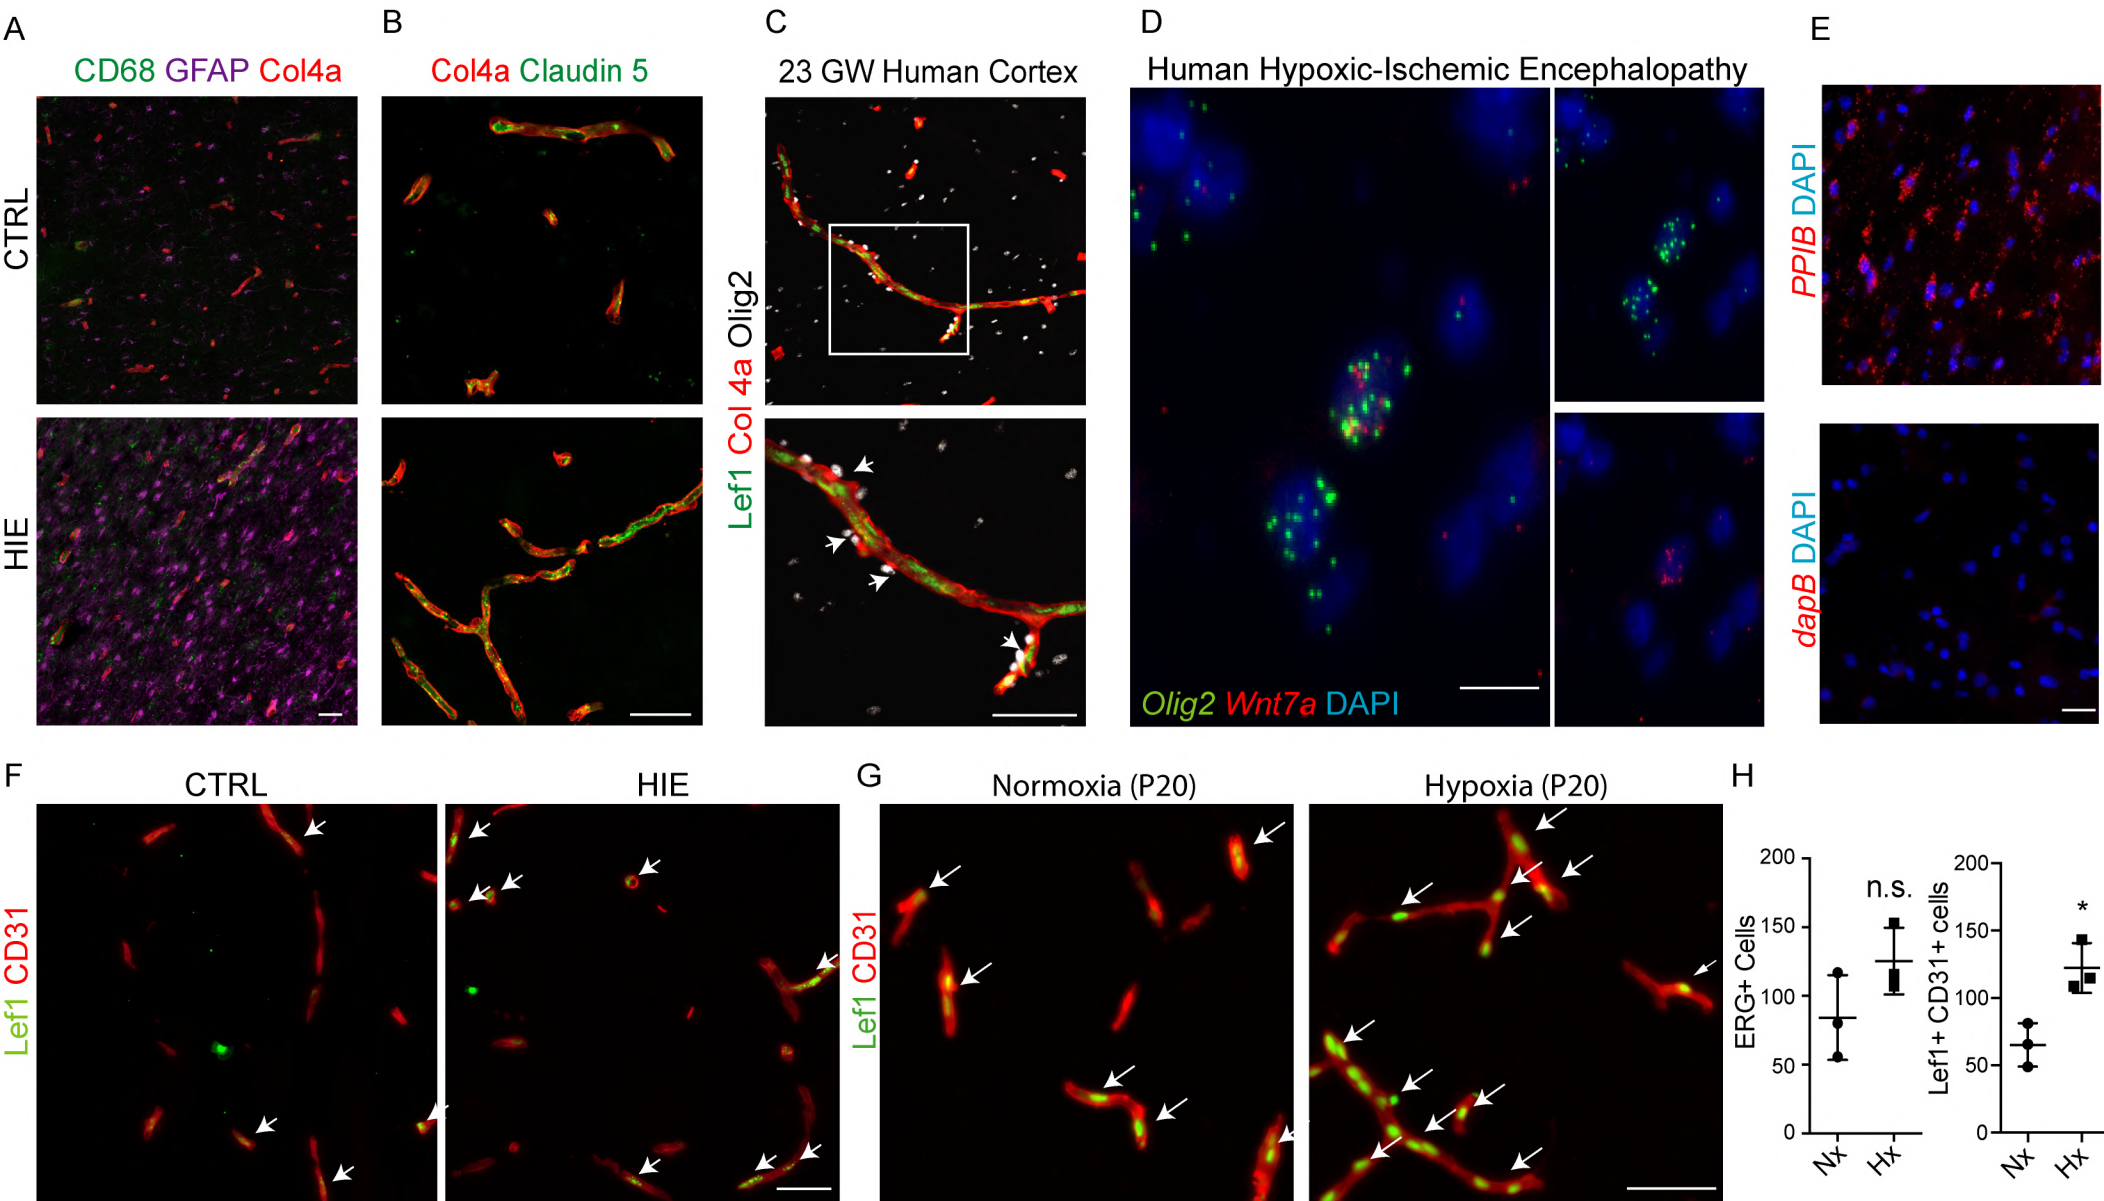

**Supplementary Figure 5: Characterization of Hypoxic Lesions in Human and Ferret Brain. (Related to Figure 4)**

(A) Increase in astrogliosis and macrophage infiltration in HIE lesions revealed by GFAP and CD68 immunostaining. Scale bar: 50µm.

(B) Claudin 5+ junctional coverage on the vessels was not affected in the HIE white matter lesions. Scale bar: 50µm.

(C) Higher numbers of Lef1+ endothelia in vessels that are in apposition to Olig2+ cells in 23 Gestational Weeks (GW) developing human brain. Scale bar: 50µm.

(D) Multiplex smFISH of *Wnt7a* and *Olig2* in HIE white matter lesions. Scale bar: 10µm.

(E) RNAScope positive (*PPIB*; top panel) and negative (*dapB*; bottom panel) controls from human brain tissue. Scale bar: 25µm.

(F) Endothelial cells in the white matter lesions of HIE cases showed higher Lef1+ expression. Scale bar: 50µm.

(G) Increase in Lef1+ endothelial cells in white matter tracts of ferrets reared in hypoxia. Scale bar: 50µm.

(H) Quantification of ERG+ and Lef1+ endothelial cells in normoxic and hypoxic ferret brain white matter tracts. Data are represented as mean  $\pm$  S.D. and analyzed by two-tailed unpaired Student's t test. n=3 animals per condition for data represented in (H). Significance between two groups are shown as \*p<0.05; n.s. not significant.

Supplementary Figure 6

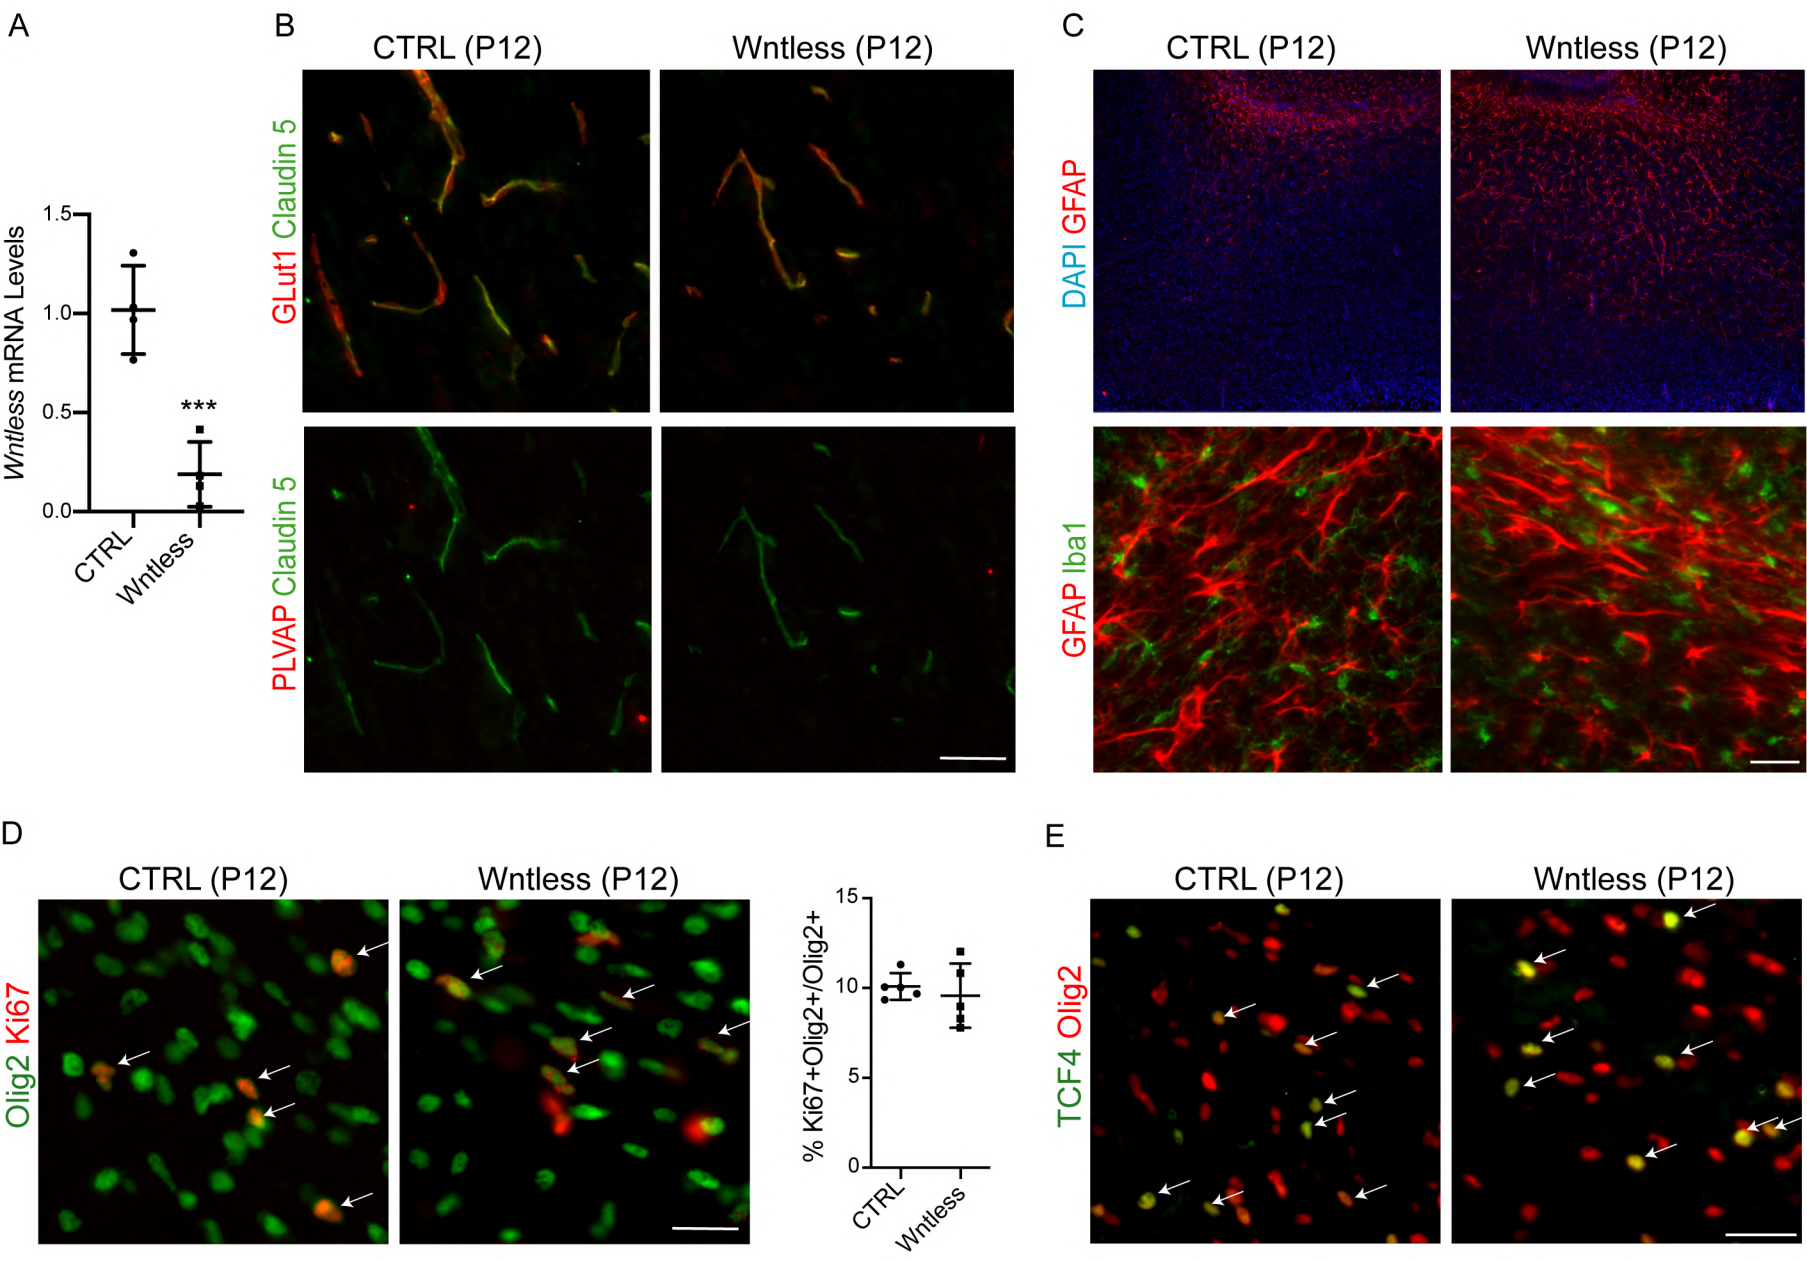

**Supplementary Figure 6: Additional Characterization of *Wntless* cKO Animals.  
(Related to Figures 5, 6 and 7)**

(A) Significant decrease in *Wntless* mRNA expression levels in P3 *Wntless* cKO white matter tissue isolates.

(B) Immunostaining for Claudin 5, Glut1 (top panels) and PLVAP (bottom panels) did not reveal any blood brain barrier (BBB) disruptions in *Wntless* cKO brain. Scale bar: 50µm.

(C) Mild astroglial reactivity was noticed in the *Wntless* cKO forebrain white matter region but microglial inflammatory response was not observed. Scale bar: 50µm.

(D) Proliferation of oligodendroglial cells is not affected in *Wntless* cKO white matter at P12. Scale bar: 25µm.

(E) Oligodendroglial TCF4 expression is not affected in *Wntless* cKO white matter. Scale bar: 25µm. Data are represented as mean  $\pm$  S.D. and analyzed by two-tailed unpaired Student's t test, n=4 animals/genotype for data represented in (A) and n=5 for (D). Significance between two groups are shown as \*\*\*p<0.001

Supplementary Figure 7

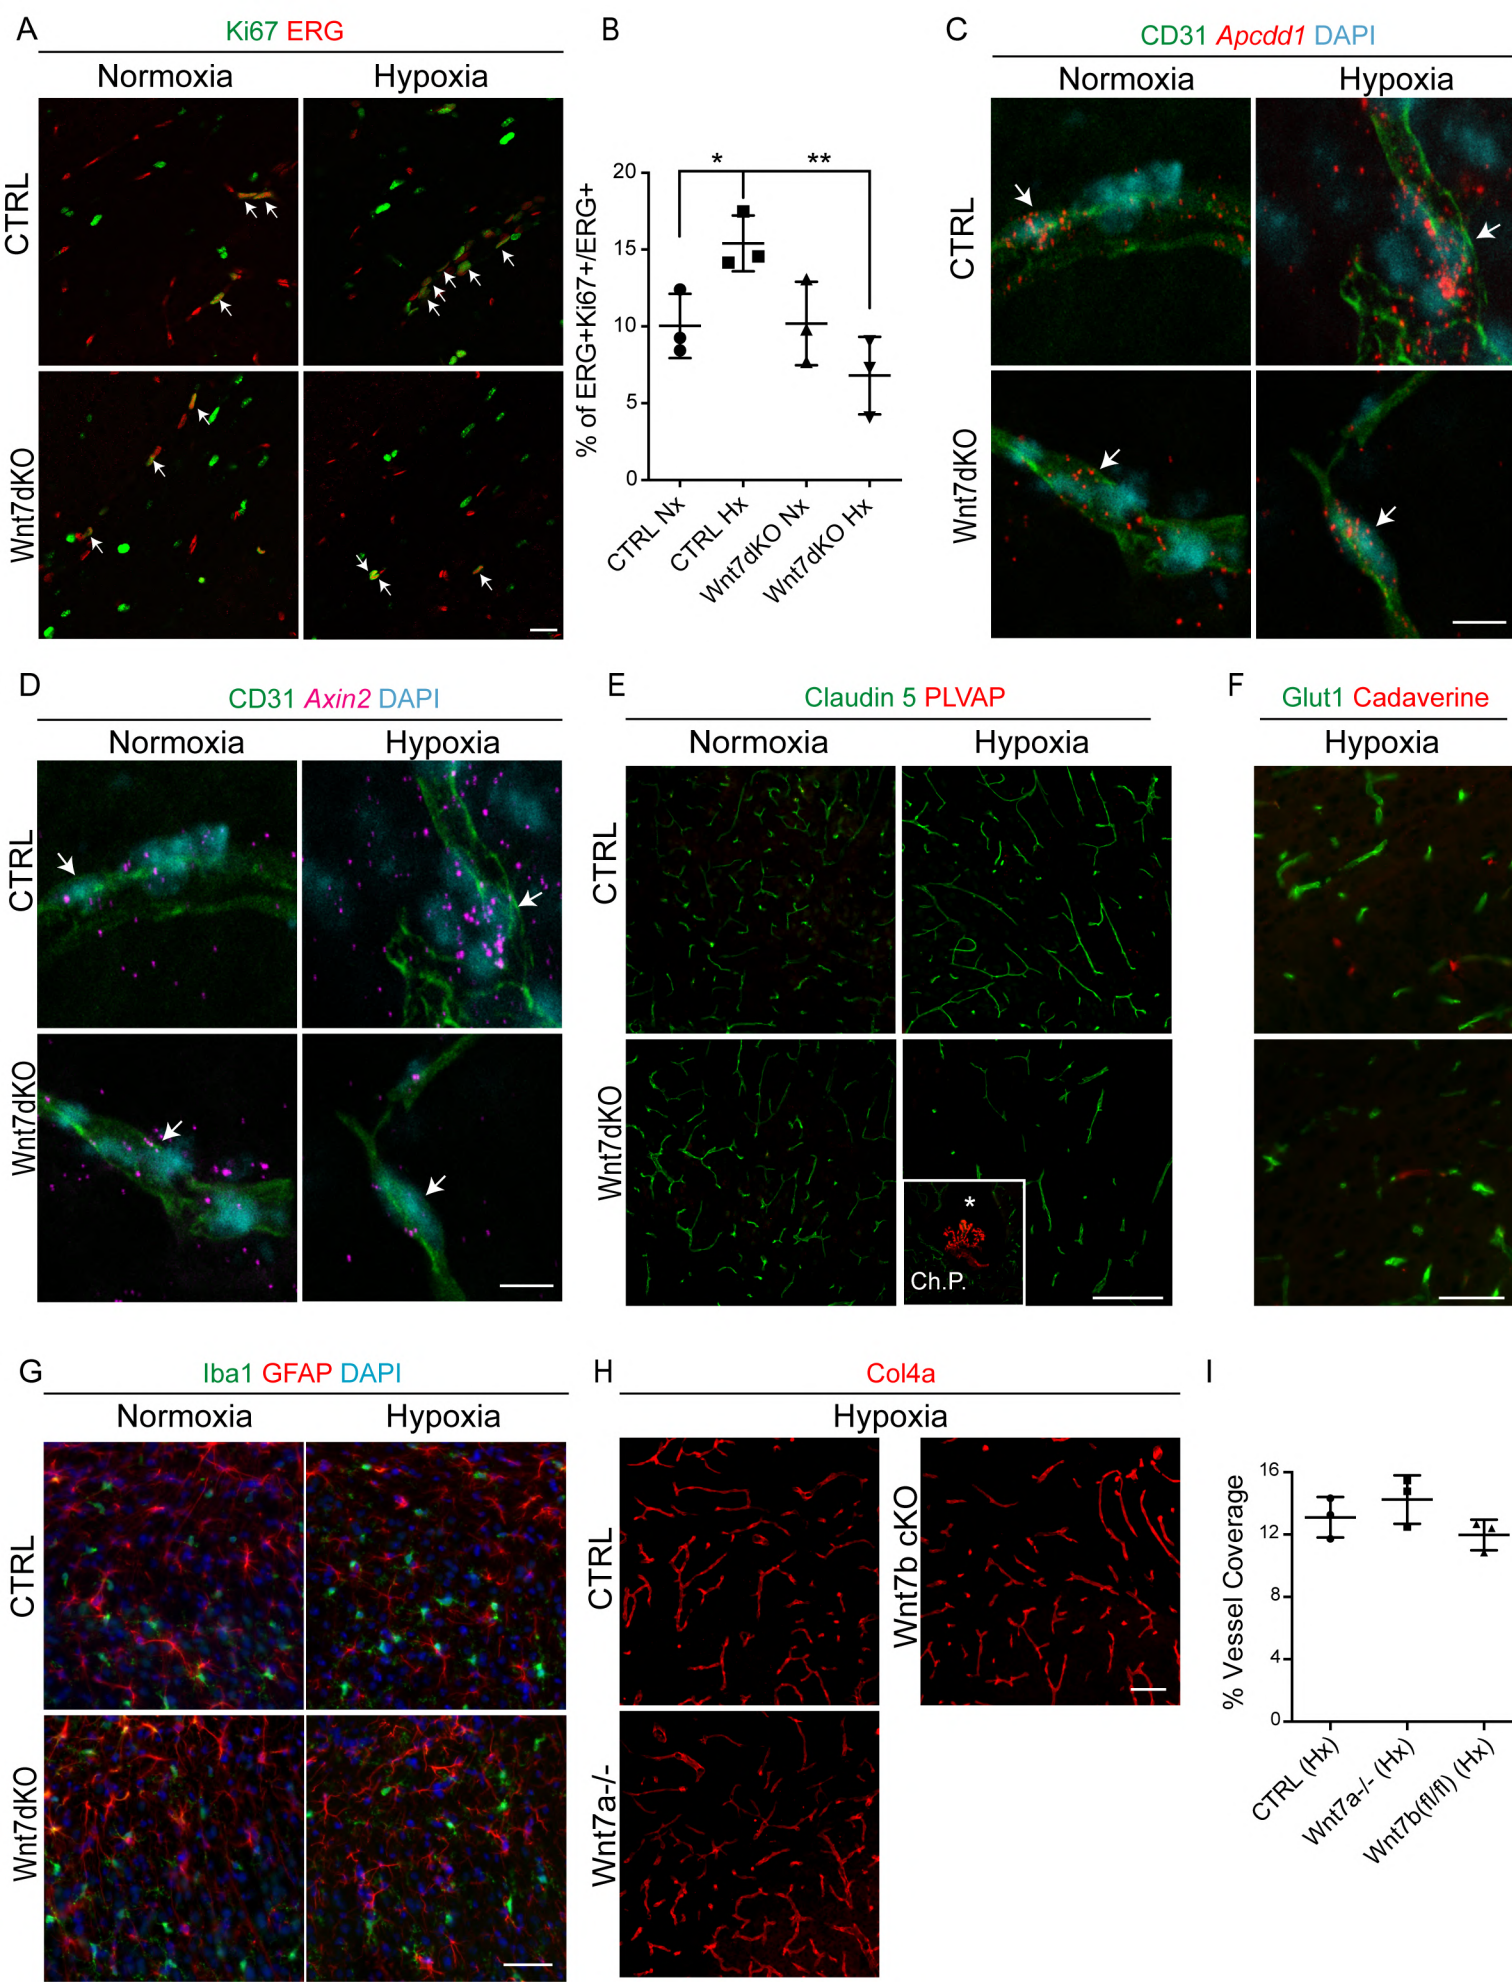

**Supplementary Figure 7: Additional Characterization and Controls Showing Oligodendroglial Wnt7a/b are Required for White Matter Vessel Growth. (Related to Figure 8)**

(A) Hypoxia induced angiogenesis in white matter is associated with endothelial cell proliferation as revealed by increase in ERG+Ki67+ cells. Note, *Wnt7dKO* animals reared in hypoxia do not exhibit a similar proliferatory response observed in controls. Scale bar: 25µm.

(B) Quantification of endothelial cell proliferation (ERG+Ki67+) in control and *Wnt7dKO* animals reared in normoxic and hypoxic conditions.

(C-D) Multiplex smFISH to label *Apcdd1* (C) and *Axin2* (D) reveals hypoxia induced increase in downstream Wnt signaling in endothelial cells of white matter at P11. Note this response was reduced in *Wnt7dKO* animals reared in hypoxia. Scale bar: 5 µm.

(E) Immunostaining for PLVAP and Claudin 5 did not reveal any BBB disruptions in *Wnt7dKO* animals. Inset in bottom right panel shows PLVAP expression in choroid plexus vessels from the same section, confirming successful PLVAP labelling. Scale bar: 50µm.

(F) Representative images from corpus collosum region of Cadaverine-555 injected control and *Wnt7dKO* animals labelled with Glut1. Note no leakage of cadaverine-555 in *Wnt7dKO* animals, indicating no damage to BBB. Scale bar: 50µm.

(G) No alterations were observed in inflammatory responses (*Iba1*) or astroglial reactivity (GFAP) in hypoxic *Wnt7dKO* animals. Scale bar: 50µm.

(H) Genetic ablation of *Wnt7a* or *Wnt7b* alone do not contribute to hinderance in hypoxia induced white matter angiogenesis as revealed by CD31 immunostaining. Scale bar: 50µm

(I) Quantification of white matter vessel coverage in Control, *Wnt7a*<sup>-/-</sup> and *Olig2-Cre/Wnt7b* (*fl/fl*) animals reared in hypoxia. Data are represented as mean ± S.D. and analyzed by two-tailed unpaired Student's t test. n=3 animals/genotype per condition for data represented in (B) and (I). Significance between two groups are shown as \*p<0.05, \*\*\*p<0.001.

Supplementary Figure 8

A

Hypoxia (P7)

CTRL

Wnt7dKO

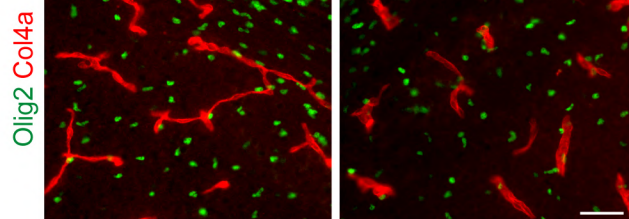

B

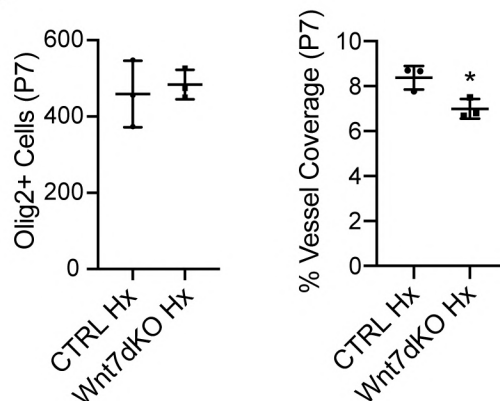

C

Control Hypoxia (P7)

Wnt7dKO Hypoxia (P7)

Cingulum

External Capsule

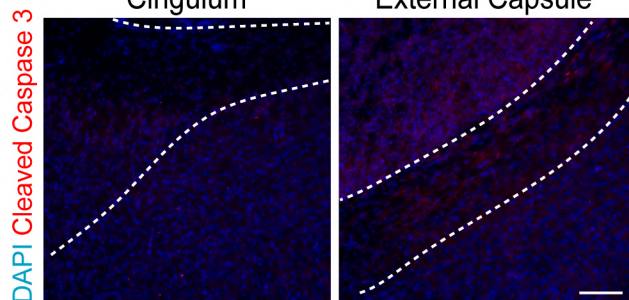

Cingulum

External Capsule

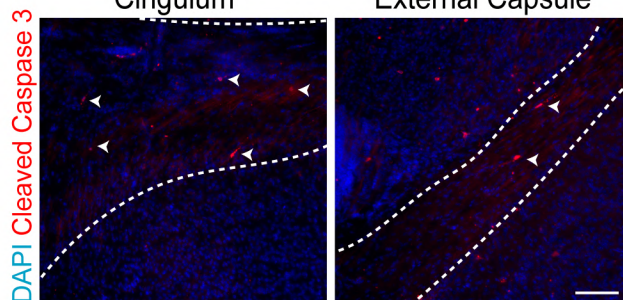

D

Olig2 PDGFRa

Normoxia (P11)

Hypoxia (P11)

CTRL

Wnt7dKO

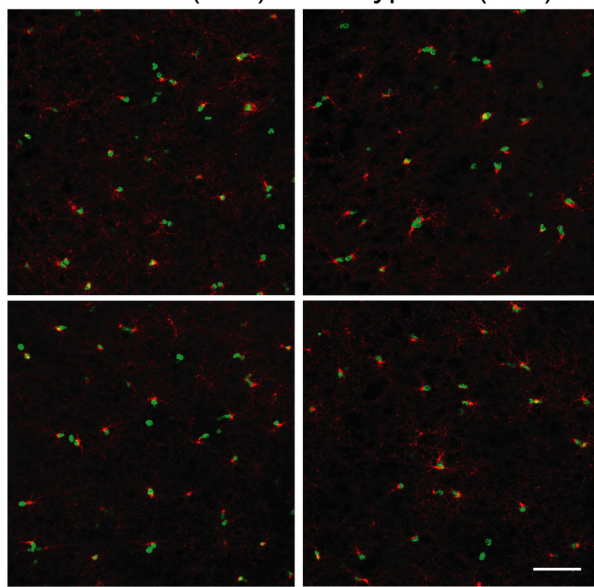

E

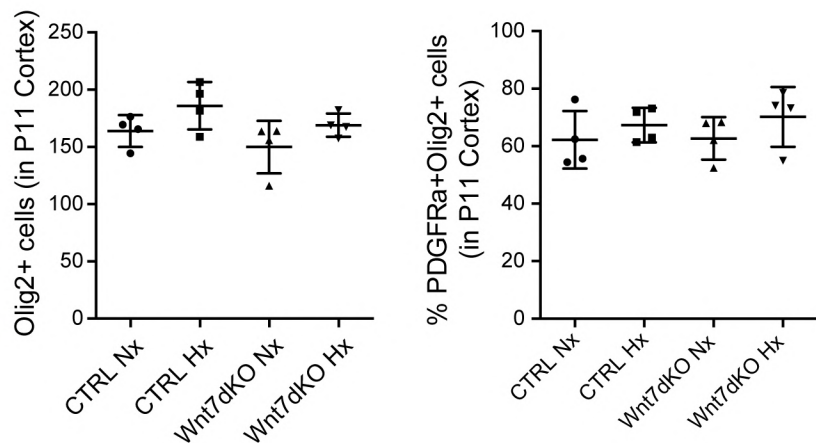

**Supplementary Figure 8: Additional Characterization of White Matter and Cortical Oligodendroglial Development in *Wnt7dKO* Mutants. (Related to Figure 8)**

(A) Representative images from P7 white matter region of control and *Wnt7dKO* animals reared in hypoxia showing Olig2+ oligodendroglial cells and Col4a+ blood vessels. Note a decrease in blood vessel density compared to control. Scale bar: 50µm.

(B) Quantification of P7 white matter Olig2+ cell numbers and vessel coverage.

(C) Hypoxic *Wnt7dKO* animals show increase in apoptosis marker, cleaved caspase 3 in white matter regions, cingulum and external capsule at P7 compared to control animals reared in hypoxia. Scale bar: 50µm.

(D) Cortical PDGFRa+Olig2+ oligodendroglial precursor cell numbers were not affected by hypoxia in *Wnt7dKO* animals. Scale bar: 50µm.

(E) Quantification of Olig2+ oligodendroglial and PDGFRa+Olig2+ oligodendroglial precursor cell numbers in cortex. Data are represented as mean  $\pm$  S.D. and are analyzed by two-tailed unpaired Student's t test and n=3 animals/genotype per condition for data represented in (B) and n=4 for (E). Significance between two groups are shown as \*p<0.05.

**Supplementary Table 1: Human postmortem cases analyzed in this study (Related to Figure 4).**

| Identification | Neuropathology | Gestational age | Postnatal age | Sex | Clinical Diagnosis     |
|----------------|----------------|-----------------|---------------|-----|------------------------|
| UCSF 2010-008  | Control        | 36 Weeks        | 0 Days        | F   | Diaphragmatic Hernia   |
| UCSF 2010-013  | Control        | 37 Weeks        | 2 Days        | F   | Pneumothorax           |
| UCSF 2010-005  | Control        | 40 Weeks        | 0 Days        | M   | Diaphragmatic Hernia   |
| UCSF 2010-012  | Control        | 40 Weeks        | 2 Days        | M   | Diaphragmatic Hernia   |
| UCSF 2017-032  | Control        | 37 Weeks        | 2 Days        | M   | Hydronephrosis         |
| UCSF 2012-003  | Control        | 36 Weeks        | 10 Days       | M   | VATER malformation     |
| UCSF 2010-019  | HIE            | 35 Weeks        | 6 Days        | M   | Unknown/IVH            |
| UCSF 2011-005  | HIE            | 40 Weeks        | 3 Days        | M   | Placental abruption    |
| UCSF 2013-008  | HIE            | 39 Weeks        | 1 day         | M   | Fetal Bradycardia      |
| UCSF 2010-016  | HIE            | 37 Weeks        | 5 Days        | F   | Birth Asphyxia         |
| UCSF 2017-027  | HIE            | 40 Weeks        | 9 Days        | F   | Pulmonary hypertension |
| UCSF 2012-001  | HIE            | 38 Weeks        | 3 Days        | F   | Birth Asphyxia         |
| UCSF 2016-004  | Control        | 17 Weeks        | 0 Days        | M   | Tetralogy of fallot    |

**Supplementary Table 2: Primer sequences used in this study. (Related to Figures 5 and 6)**

|           |   |                         |
|-----------|---|-------------------------|
| Plvap     | F | GTTGACTACGCGACGTGAGATG  |
|           | R | AGCTGTTCTGCGCACTGCTTCT  |
| Claudin 5 | F | TGACTGCCTTCCTGGACCACAA  |
|           | R | CATACACCTTGCACTGCATGTGC |
| Zic3      | F | CACACTGGCGAGAAACCCTTCC  |
|           | R | GTTGGCAAACCGTCTGTCACAG  |
| Foxf2     | F | CCAGCATGTCTTCCTACTCGTTG |
|           | R | CTTTCCTGTGCGCACTGGAGT   |
| Mfsd2a    | F | GGTCTCAGAAGTTGCCAATCGC  |
|           | R | GAAGGCACAGAGGACGTAGATG  |

|         |   |                           |
|---------|---|---------------------------|
| Vegfr2  | F | CGAGACCATTTGAAGTGAAGTGGCC |
|         | R | TTCCTCACCCCTGCGGATAGTCA   |
| Dll4    | F | GGGTCCAGTTATGCCTGCGAAT    |
|         | R | TTCGGCTTGGACCTCTGTTCAG    |
| Apln    | F | AGGCATAGCGTCCTCACCTCTT    |
|         | R | GGTGCAGAAACGACAAAGACGG    |
| Vegfa   | F | CTGCTGTAACGATGAAGCCCTG    |
|         | R | GCTGTAGGAAGCTCATCTCTCC    |
| Ndp     | F | CTGATGGACTCTCAACGCTGCA    |
|         | R | CTCAGAGCGTGATGCCTGGCT     |
| Sema3e  | F | CACTGTGCCTTCATCAGAGTCG    |
|         | R | CCAACTAGCGTGGACACAAAGG    |
| Ntn1    | F | GTCTGGTGTGTGACTGTAGGCA    |
|         | R | CCGAGCATGGAGGTTGCAGTTG    |
| Wntless | F | TTGCTGTTGGCTCCTTCTGCCT    |
|         | R | GGCAGATACCTGCCACAATGATG   |
